# Supplementary material for: Floating Gate, Organic Field-Effect Transistor-Based Sensors towards Biomedical Applications Fabricated with Large-Area Processes over Flexible Substrates
Source: PubMed Central journal article supplement (PMC5876878; doi:10.3390/s18030688), 2018-02-26
Supplement: sensors-18-00688-s001.pdf [file sensors-18-00688-s001.pdf]

## Supplementary Materials

# Floating Gate, Organic Field-Effect Transistor-Based Sensors towards Biomedical Applications Fabricated with Large-Area Processes over Flexible Substrates

Stefano Lai \*, Fabrizio Antonio Viola , Piero Cosseddu and Annalisa Bonfiglio

Department of Electrical and Electronic Engineering, University of Cagliari, Piazza d'Armi, 09123 Cagliari, Italy; [fabrizio.viola@diee.unica.it](mailto:fabrizio.viola@diee.unica.it) (F.A.V.); [piero.cosseddu@diee.unica.it](mailto:piero.cosseddu@diee.unica.it) (P.C.); [annalisa@diee.unica.it](mailto:annalisa@diee.unica.it) (A.B.)

\* Correspondence: [stefano.lai@diee.unica.it](mailto:stefano.lai@diee.unica.it); Tel.: +39-070-675-5769

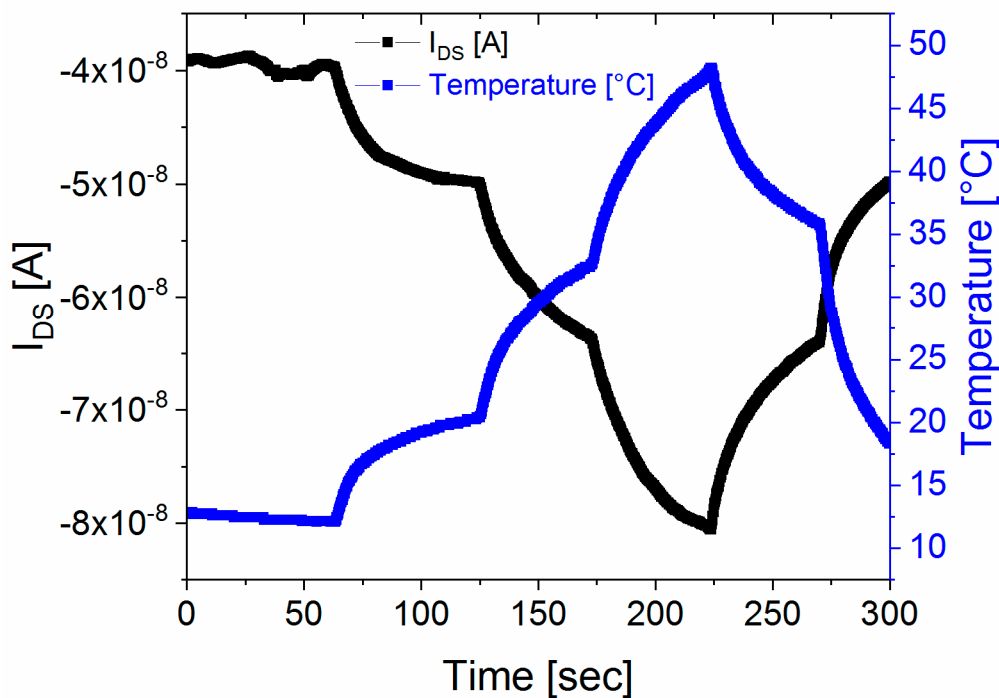

Figure S1: Example of heating/cooling cycle.
